# Supplementary material for: The role of the aryl hydrocarbon receptor in the development of cells with the molecular and functional characteristics of cancer stem-like cells
Source: PubMed Central journal article supplement (PMC4794823; doi:10.1186/s12915-016-0240-y), 2016-03-16

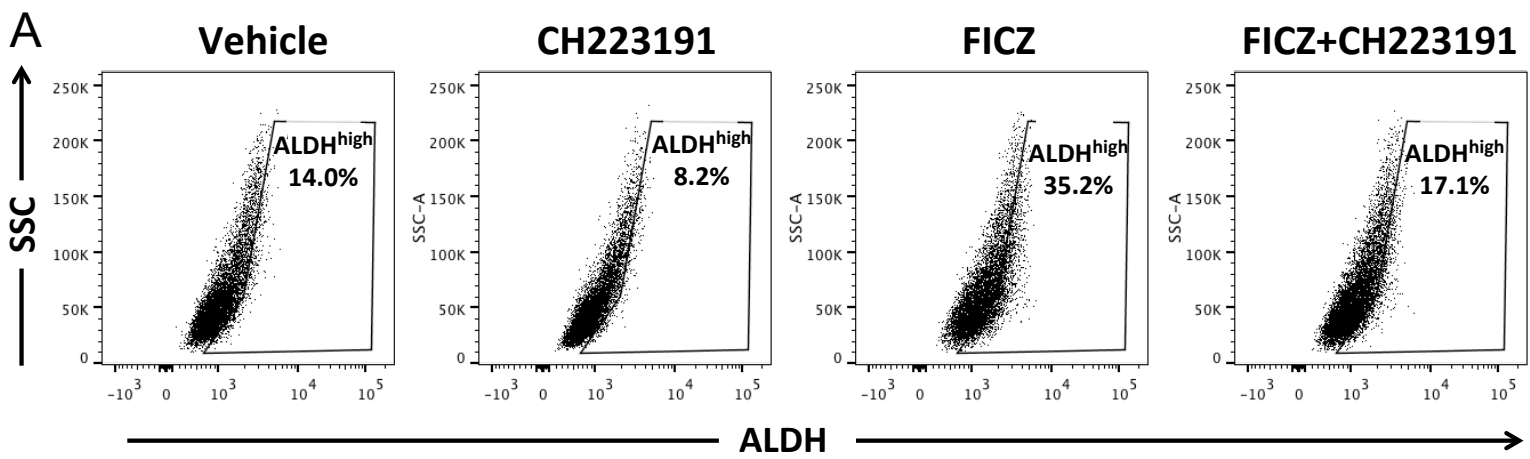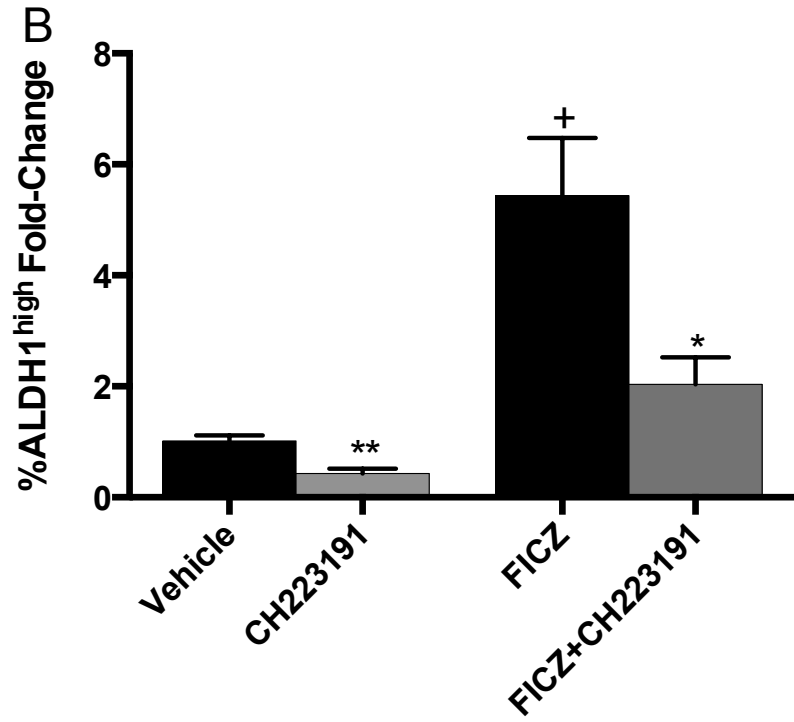

Supplement: 12915_2016_240_MOESM2_ESM.pdf [file 12915_2016_240_MOESM2_ESM.pdf]
